# Supplementary material
Source: PubMed Central journal article supplement (PMC2858455)
Supplement: NIHMS183370-supplement-02.pdf [file NIHMS183370-supplement-02.pdf]

**Table S2. Reclassification of eGFR Categories by the CKD-EPI and the MDRD Study Equations, Stratified According to All-Cause Mortality (yes or no) During Follow-up**

|                                                    | eGFR <sub>CKD-EPI</sub> (mL/min/1.73 m <sup>2</sup> ) |       |       |     | Total No. |
|----------------------------------------------------|-------------------------------------------------------|-------|-------|-----|-----------|
|                                                    | 90-119                                                | 60-89 | 30-59 | <30 |           |
| Participants who died                              |                                                       |       |       |     |           |
| eGFR <sub>MDRD</sub> (mL/min/1.73 m <sup>2</sup> ) |                                                       |       |       |     |           |
| 90-119                                             | 958                                                   | 0     | 0     | 0   | 958       |
| 60-89                                              | 373                                                   | 726   | 0     | 0   | 1,099     |
| 30-59                                              | 0                                                     | 24    | 87    | 0   | 111       |
| <30                                                | 0                                                     | 0     | 0     | 25  | 25        |
| Total No.                                          | 1,331                                                 | 750   | 87    | 25  | 2,193     |
| Participants who did not die                       |                                                       |       |       |     |           |
| eGFR <sub>MDRD</sub> (mL/min/1.73 m <sup>2</sup> ) |                                                       |       |       |     |           |
| 90-119                                             | 4,275                                                 | 0     | 0     | 0   | 4,275     |
| 60-89                                              | 2,706                                                 | 3,054 | 0     | 0   | 5,760     |
| 30-59                                              | 0                                                     | 127   | 109   | 0   | 236       |
| <30                                                | 0                                                     | 0     | 0     | 2   | 2         |
| Total No.                                          | 6,981                                                 | 3,181 | 109   | 2   | 10,273    |

Note: Net reclassification improvement was calculated as follows: clinically correct reclassification (proportion of participants reclassified upward among those did not die: [2,706 + 127]/10,273) less clinically incorrect reclassification (proportion of participants reclassified upward among those died: [373 + 24]/2193) = 0.095 ( $P < 0.001$ ).

Definitions: eGFR<sub>CKD-EPI</sub>, estimated glomerular filtration rate (eGFR) calculated using the CKD Epidemiology Collaboration (CKD-EPI) equation; eGFR<sub>MDRD</sub>, estimated glomerular filtration rate calculated using the Modification of Diet in Renal Disease (MDRD) Study equation.
