# Supplementary material
Source: PubMed Central journal article supplement (PMC2858455)
Supplement: NIHMS183370-supplement-03.pdf [file NIHMS183370-supplement-03.pdf]

**Table S3. Reclassification of eGFR Categories by the CKD-EPI and MDRD Study Equations, Stratified According to Incident CHD (yes or no) During Follow-up**

|                                                    | eGFR <sub>CKD-EPI</sub> (mL/min/1.73 m <sup>2</sup> ) |       |       |     | Total No. |
|----------------------------------------------------|-------------------------------------------------------|-------|-------|-----|-----------|
|                                                    | 90-119                                                | 60-89 | 30-59 | <30 |           |
| <b>Participants who had incident CHD</b>           |                                                       |       |       |     |           |
| eGFR <sub>MDRD</sub> (mL/min/1.73 m <sup>2</sup> ) |                                                       |       |       |     |           |
| 90-119                                             | 695                                                   | 0     | 0     | 0   | 695       |
| 60-89                                              | 359                                                   | 584   | 0     | 0   | 943       |
| 30-59                                              | 0                                                     | 18    | 53    | 0   | 71        |
| <30                                                | 0                                                     | 0     | 0     | 7   | 7         |
| Total No.                                          | 1,054                                                 | 602   | 53    | 7   | 1,716     |
| <b>Participants who did not have incident CHD</b>  |                                                       |       |       |     |           |
| eGFR <sub>MDRD</sub> (mL/min/1.73 m <sup>2</sup> ) |                                                       |       |       |     |           |
| 90-119                                             | 4,538                                                 | 0     | 0     | 0   | 4,538     |
| 60-89                                              | 2,720                                                 | 3,196 | 0     | 0   | 5,916     |
| 30-59                                              | 0                                                     | 133   | 143   | 0   | 276       |
| <30                                                | 0                                                     | 0     | 0     | 20  | 20        |
| Total No.                                          | 7,258                                                 | 3,329 | 143   | 20  | 10,750    |

Note: Net reclassification improvement (NRI) was calculated as follows: clinically correct reclassification (proportion of participants reclassified upward among those did have incident CHD:  $[2,720 + 133]/10,750$ ) - clinically incorrect reclassification (proportion of participants reclassified upward among those had incident CHD:  $[359 + 18]/1,716$ ) = 0.046 ( $P < 0.001$ ).

Definitions: eGFR<sub>CKD-EPI</sub>, estimated glomerular filtration rate (eGFR) calculated using the CKD Epidemiology Collaboration (CKD-EPI) equation; eGFR<sub>MDRD</sub>, estimated glomerular filtration rate calculated using the Modification of Diet in Renal Disease (MDRD) Study equation.
