# Supplementary material
Source: PubMed Central journal article supplement (PMC2858455)
Supplement: NIHMS183370-supplement-04.pdf [file NIHMS183370-supplement-04.pdf]

**Table S4. Reclassification of eGFR categories by the CKD-EPI and MDRD Study Equations, Stratified According to Incident Stroke (yes or no) During Follow-up**

|                                                      | eGFR <sub>CKD-EPI</sub> (mL/min/1.73 m <sup>2</sup> ) |       |       |     | Total No. |
|------------------------------------------------------|-------------------------------------------------------|-------|-------|-----|-----------|
|                                                      | 90-119                                                | 60-89 | 30-59 | <30 |           |
| <b>Participants who had incident stroke</b>          |                                                       |       |       |     |           |
| eGFR <sub>MDRD</sub> (mL/min/1.73 m <sup>2</sup> )   |                                                       |       |       |     |           |
| 90-119                                               | 258                                                   | 0     | 0     | 0   | 258       |
| 60-89                                                | 110                                                   | 210   | 0     | 0   | 320       |
| 30-59                                                | 0                                                     | 11    | 24    | 0   | 35        |
| <30                                                  | 0                                                     | 0     | 0     | 3   | 3         |
| Total No.                                            | 368                                                   | 221   | 24    | 3   | 616       |
| <b>Participants who did not have incident stroke</b> |                                                       |       |       |     |           |
| eGFR <sub>MDRD</sub> (mL/min/1.73 m <sup>2</sup> )   |                                                       |       |       |     |           |
| 90-119                                               | 4,975                                                 | 0     | 0     | 0   | 4,975     |
| 60-89                                                | 2,969                                                 | 3,570 | 0     | 0   | 6,539     |
| 30-59                                                | 0                                                     | 140   | 172   | 0   | 312       |
| <30                                                  | 0                                                     | 0     | 0     | 24  | 24        |
| Total No.                                            | 7,944                                                 | 3,710 | 172   | 24  | 11,850    |

Note: Net reclassification improvement (NRI) was calculated as follows: clinically correct reclassification (proportion of participants reclassified upward among those did have incident stroke:  $[2,969 + 140]/11,850$ ) - clinically incorrect reclassification (proportion of participants reclassified upward among those had incident stroke:  $[110 + 11]/616$ ) = 0.066 ( $P < 0.001$ ).

Definitions: eGFR<sub>CKD-EPI</sub>, estimated glomerular filtration rate (eGFR) calculated using the CKD Epidemiology Collaboration (CKD-EPI) equation; eGFR<sub>MDRD</sub>, estimated glomerular filtration rate calculated using the Modification of Diet in Renal Disease (MDRD) Study equation.
