# Supplementary material
Source: PubMed Central journal article supplement (PMC2858455)
Supplement: NIHMS183370-supplement-06.pdf [file NIHMS183370-supplement-06.pdf]

**Table S6. Net Reclassification Improvement (NRI) by the CKD-EPI Equation based on 10-y risk categories (<5%, 5-<10%, 10-<20%, and ≥20%)**

| Models                                                      | Outcomes |        |                     |        |       |        |        |     |
|-------------------------------------------------------------|----------|--------|---------------------|--------|-------|--------|--------|-----|
|                                                             | ESRD     |        | All-cause mortality |        | CHD   |        | Stroke |     |
|                                                             | NRI      | P      | NRI                 | P      | NRI   | P      | NRI    | P   |
| eGFR as a categorical variable (crude)                      | 0.264    | <0.001 | 0.035               | <0.001 | 0.044 | <0.001 | NA*    |     |
| eGFR as a categorical variable (demographically adjusted**) | 0.022    | 0.04   | 0.008               | 0.1    | 0.007 | 0.3    | 0.006  | 0.2 |
| eGFR as a categorical variable (fully adjusted***)          | 0.013    | 0.5    | 0.007               | 0.1    | 0.007 | 0.1    | -0.003 | 0.7 |
| eGFR as a spline (crude)                                    | 0.015    | 0.3    | 0.009               | 0.1    | 0.049 | <0.001 | 0.002  | 0.6 |
| eGFR as a spline (demographically adjusted**)               | -0.006   | 0.7    | -0.002              | 0.6    | 0.015 | 0.02   | 0.005  | 0.4 |
| eGFR as a spline (fully adjusted***)                        | 0.007    | 0.5    | 0.008               | 0.06   | 0.011 | 0.04   | 0.009  | 0.2 |

Abbreviations: CKD-EPI, Chronic Kidney Disease Epidemiology Collaboration; eGFR, estimated glomerular filtration rate; ESRD, end-stage renal disease; CHD, coronary heart disease.

\*All participants were categorized into the lowest group (<5%) by both equations, so that there was no reclassification

\*\*adjusted for age, gender, and race

\*\*\*adjusted for covariates used in Table 2
